# Supplementary material
Source: HighWire-hosted journal article supplement (https://adc.bmj.com/content/101/10/945)
Supplement: inline-supplementary-material-3 [file inline-supplementary-material-3.pdf]

## RCH Simulation Scenario: Child with Sepsis

### Set Up:

| Mannequin /Confederate                                   | Moulage                             | Equipment available                      | Drugs available           |
|----------------------------------------------------------|-------------------------------------|------------------------------------------|---------------------------|
| SimJunior                                                | <b>Pale, port access right side</b> | All ED resus equipment available in situ | Click here to enter text. |
| <b>Cat 1 Call to resus – 2AM</b>                         | Bag valve mask for oxygen delivery  | Oxygen cylinder + tubing                 | Click here to enter text. |
| <b>Confederate- on phone in control room as PICU reg</b> |                                     | Click here to enter text.                | Click here to enter text. |

**Monitor:** Basic

**Paperwork Required:** Observational Chart  
Drug Chart  
Blood gas - venous  
Blood glucose

### Learning Objectives:

(1) *Medical*

- Recognise the presentation of septic shock  
Recognise potential delayed presentation  
Manage relative hypovolaemia secondary to septic shock  
sequential management of hypotension  
Escalation to inotropes and PICU admission  
Recognise patients at high risk for septic shock

(2) *CRM*

- Demonstrate effective teamwork and communication including PICU call, role clarity, resource utilisation, discussion with ICU

### Synopsis of Scenario

8 year old male with 2 day history of fever (Temp >38 at home, max 39.8) Child has acute lymphocytic leukaemia and received induction chemotherapy 4 days ago.

Parents rushed him in at 2am as they were unable to rouse him at home

PMHx – 2 months of chemo, has a history of line sepsis in the past, not recently. Has a port present

Meds – paracetamol, ibuprofen, Bactrim, recent induction chemo, Ranitidine

3 doctors and 2 nurses (inc confederate) and NP Resus leader ideal for this scenario

### Patient Demographics

|                        |              |                 |                               |        |  |
|------------------------|--------------|-----------------|-------------------------------|--------|--|
| <b>Patient Name:</b>   | Jeff Daniels | <b>DOB/Age:</b> | January 31st 2007 8 years old |        |  |
| <b>Medical History</b> | Nil          | <b>Weight:</b>  | 25 Kgs                        |        |  |
| <b>Allergies:</b>      | nil          | <b>Male</b>     | X                             | Female |  |
| <b>Dx/Procedure:</b>   |              |                 |                               |        |  |
| <b>Other:</b>          |              |                 |                               |        |  |

**Resus team leader - Introductory information given to team by triage nurse who has urgently brought child through to resus**

Handover as per ISBAR

- I** Introduces pt as JD
- S** 8 yo obtunded, looks very unwell
- B** ALL, recent chemo
- A** Drowsy / obtunded, temp 39.2, P 146, RR 44, BP 68/38, Sats 80's RA
- R** Has right sided port

**Start of scenario: Team: 3 doctors and 2 nurses (includes ED nurse confederate) and 1 Triage nurse who hands child over. (if numbers available could also have Mum in the room?)**

**Ideal Immediate Management:**

**Team form:** leader, delegate roles: circulation doctor and nurse, airway doctor and nurse, scribe.

**Call for help:** Dependant on team experience / confidence

**Organise resources:** equipment, prepare drugs. Communicate clearly, politely and effectively

**Initial Observations:**

|                                                       | ↑, N, ↓, absent | Description                                                  |
|-------------------------------------------------------|-----------------|--------------------------------------------------------------|
| <b>Appearance</b>                                     |                 | Pale, min responsive to pain, mottled, grey, unwell looking  |
| <b>HR</b>                                             | ↑               | 140, sinus                                                   |
| <b>RR</b>                                             | ↑               | 44, rapid and shallow                                        |
| <b>Temp – peripheral<br/>- central</b>                | ↑               | 39.2                                                         |
| <b>Saturation</b> <b>NOT</b>                          | Normal          | 82% RA                                                       |
| <b>Non- invasive BP – upper limb<br/>- lower limb</b> | ↓               | 68/38                                                        |
| <b>Pupils</b>                                         |                 | Pupils small / reactive                                      |
| <b>Conscious state</b>                                |                 | Responds to Pain only- moans- on AVPU scale, GCS <8 (E2V2M2) |

**Ideal Management: post pt arrival**

**Examination:**

**Management:**

**DRS ABCDE**

**Airway** patent

**Breathing** shallow, tachypnoea, sats 82%

**CVS:** central perfusion 6 seconds

**Disability-** conscious state, pupils, tone.

**Exposure-** temperature, warm patient

- Applies O2 mask if tolerated
- Apply monitoring-ECG/ SpO2
- Recognises port, accesses port
- Path – FBE, UE, VBG, Coag, G and H, Culture
- Recognises impaired conscious state
- Recognises potential for life threatening sepsis
- Recognises need for fluid bolus and second IV access
- Empiric ABx as per protocol

**Progression Good: (if good, allow scenario to progress to being more complex)**

**CUES:**

- Persistent hypotension
- requires 2 \* 20ml / kg fluid boluses
- Febrile
- Hypoxia
- 2 fluid boluses

**Ideal Management:**

- Empiric Abx
- 2<sup>nd</sup> IV access, second blood culture
- urgent CXR, preparation for intubation

**Correct Management results in following Obs on Monitor**

**HR 140, BP 70/40, Temp 39, RR 40, sats 90% on 15l pt still obtunded, barely responds to pain**

**CUES:**

- Continued hypotension
- Potential for team to be out of depth
- Venous gas returns with pH 7.1, PCO 60, lactate 7 bicarb 10, HB 50
- BSL 2.0
- Continued Hypoxia

**Ideal Management:**

- Discussion re inotropes
- Phone for help, alert PICU
- Discuss with PICU and Onco on call re blood replacement
- 2 – 5 ml / kg 10% Dextrose
- urgent CXR, preparation for intubation, MET Call

**ICU attend at the point of inotropes and intubation discussion - ISBAR handover**

**Scenario finishes 10-15 mins after pt arrival and team have fluid resuscitated pt, started ABx, corrected hypoglycaemia and have discussed inotropes / intubation / called for help**
